# Supplementary material for: Asthma, Rhinoconjunctivitis, Eczema, and the Association with Perinatal Anthropometric Factors in Vietnamese Children
Source: PubMed Central journal article supplement (PMC6389945; doi:10.1038/s41598-019-39658-5), 2019-02-25
Supplement: 41598_2019_39658_MOESM1_ESM.pdf [file 41598_2019_39658_MOESM1_ESM.pdf]

**Title**

**Asthma, Rhinoconjunctivitis, Eczema, and the Association with Perinatal Anthropometric Factors in Vietnamese Children**

Michiko Toizumi, Masahiro Hashizume, Hien Anh T. Nguyen, Michio Yasunami, Noriko Kitamura, Chihiro Iwasaki, Mizuki Takegata, Hiroyuki Moriuchi, Duc Anh Dang, Koya Ariyoshi, and Lay-Myint Yoshida

Table S1. Crude odds ratios of asthma, rhinoconjunctivitis, and eczema for each characteristic.

| Characteristics (n=1202)      |                                                  | Total<br>number (%) | Asthma<br>crude OR (95% CI) | Rhinoconjunctivitis<br>crude OR (95% CI) | Eczema<br>crude OR (95% CI) |
|-------------------------------|--------------------------------------------------|---------------------|-----------------------------|------------------------------------------|-----------------------------|
| <b>Demographics</b>           |                                                  |                     |                             |                                          |                             |
| Sex                           | Male                                             | 610 (50.8)          | 1.00 (0.60-1.68)            | 1.10 (0.77-1.57)                         | 1.58 (0.99-2.52)            |
|                               | Female                                           | 592 (49.3)          | 1.00                        | 1.00                                     | 1.00                        |
| Body weight                   |                                                  |                     |                             |                                          |                             |
|                               | 25kg or more                                     | 568 (47.3)          | 1.08 (0.65-1.82)            | 1.25 (0.88-1.78)                         | 1.07 (0.68-1.68)            |
|                               | less than 25kg                                   | 634 (52.8)          | 1.00                        | 1.00                                     | 1.00                        |
| <b>Perinatal information</b>  |                                                  |                     |                             |                                          |                             |
| Mode of delivery              |                                                  |                     |                             |                                          |                             |
|                               | Vaginal                                          | 688 (57.2)          | 1.00                        | 1.00                                     | 1.00                        |
|                               | Caesarean section                                | 514 (42.8)          | 1.41 (0.84-2.36)            | 1.14 (0.80-1.63)                         | 0.89 (0.56-1.41)            |
| Birthweight                   |                                                  |                     |                             |                                          |                             |
|                               | >=2500g                                          | 1175 (97.8)         | 1.00                        | 1.00                                     | 1.00                        |
|                               | <2500g                                           | 27 (2.3)            | 2.41 (0.70-8.23)            | 1.35 (0.46-3.97)                         | 4.25 (1.67-10.85)           |
| <b>Family history</b>         |                                                  |                     |                             |                                          |                             |
| Mother's age at child's birth |                                                  |                     |                             |                                          |                             |
|                               | 24 years or less                                 | 312 (26.0)          | 1.00                        | 1.00                                     | 1.00                        |
|                               | 25-34 years                                      | 728 (60.6)          | 1.24 (0.66-2.31)            | 1.64 (1.05-2.57)                         | 1.92 (1.03-3.56)            |
|                               | 35 years or more                                 | 162 (13.5)          | 0.96 (0.38-2.43)            | 0.92 (0.46-1.83)                         | 1.68 (0.73-3.83)            |
| (n=1201)                      | Maternal history of asthma and allergic diseases |                     |                             |                                          |                             |
|                               | Yes                                              | 96 (8.0)            | 2.40 (1.18-4.90)            | 1.75 (1.00-3.05)                         | 2.69 (1.45-4.99)            |
|                               | No                                               | 1105 (92.0)         | 1.00                        | 1.00                                     | 1.00                        |
| (n=1201)                      | Maternal history of asthma                       |                     |                             |                                          |                             |
|                               | Yes                                              | 12 (1.0)            | 3.83 (0.82-17.88)           | 1.55 (0.34-7.14)                         | 1.28 (0.16-10.02)           |
|                               | No                                               | 1189 (99.0)         | 1.00                        | 1.00                                     | 1.00                        |
| (n=1201)                      | Maternal history of atopic eczema                |                     |                             |                                          |                             |
|                               | Yes                                              | 13 (1.1)            | 5.84 (1.57-21.81)           | 0.64 (0.08-4.95)                         | 4.33 (1.17-16.05)           |
|                               | No                                               | 1188 (98.9)         | 1.00                        | 1.00                                     | 1.00                        |
| (n=1201)                      | Maternal history of rhinitis                     |                     |                             |                                          |                             |
|                               | Yes                                              | 76 (6.3)            | 1.34 (0.52-3.46)            | 2.00 (1.10-3.63)                         | 2.59 (1.31-5.13)            |
|                               | No                                               | 1125 (93.7)         | 1.00                        | 1.00                                     | 1.00                        |
| (n=1191)                      | Paternal history of asthma and allergic diseases |                     |                             |                                          |                             |
|                               | Yes                                              | 47 (4.0)            | 0.83 (0.20-3.52)            | 2.15 (1.04-4.42)                         | 3.58 (1.67-7.69)            |
|                               | No                                               | 1144 (96.1)         | 1.00                        | 1.00                                     | 1.00                        |
| (n=1191)                      | Paternal history of asthma                       |                     |                             |                                          |                             |

|                             |                                   |             |                   |                   |                   |
|-----------------------------|-----------------------------------|-------------|-------------------|-------------------|-------------------|
|                             | Yes                               | 9 (0.8)     | 2.38 (0.29-19.34) | 0.95 (0.12-7.68)  | NA                |
|                             | No                                | 1182 (99.2) | 1.00              | 1.00              | 1.00              |
| (n=1191)                    | Paternal history of atopic eczema |             |                   |                   |                   |
|                             | Yes                               | 5 (0.4)     | 4.78 (0.53-43.40) | 1.91 (0.21-17.25) | 3.50 (0.39-31.72) |
|                             | No                                | 1186 (99.6) | 1.00              | 1.00              | 1.00              |
| (n=1191)                    | Paternal history of rhinitis      |             |                   |                   |                   |
|                             | Yes                               | 33 (2.8)    | NA                | 2.53 (1.12-5.73)  | 4.83 (2.10-11.08) |
|                             | No                                | 1158 (97.2) | 1.00              | 1.00              | 1.00              |
| <b>Socioeconomic status</b> |                                   |             |                   |                   |                   |
| (n=1157)                    | Wealth level                      |             |                   |                   |                   |
|                             | Low                               | 386 (33.4)  | 1.00              | 1.00              | 1.00              |
|                             | Middle                            | 386 (33.4)  | 1.00 (0.51-1.95)  | 1.16 (0.75-1.81)  | 1.90 (1.03-3.49)  |
|                             | High                              | 385 (33.3)  | 1.18 (0.62-2.25)  | 1.14 (0.73-1.77)  | 1.97 (1.07-3.61)  |
| (n=1201)                    | Maternal education level          |             |                   |                   |                   |
|                             | No or primary school              | 152 (12.7)  | 1.00              | 1.00              | 1.00              |
|                             | Secondary school                  | 403 (33.5)  | 1.45 (0.53-3.97)  | 0.84 (0.47-1.52)  | 0.74 (0.36-1.52)  |
|                             | High school                       | 399 (33.2)  | 1.72 (0.64-4.62)  | 0.90 (0.50-1.61)  | 0.88 (0.44-1.78)  |
|                             | College or university             | 248 (20.6)  | 1.89 (0.67-5.32)  | 1.26 (0.69-2.32)  | 0.80 (0.37-1.75)  |
| <b>Environmental status</b> |                                   |             |                   |                   |                   |
|                             | Number of siblings                |             |                   |                   |                   |
|                             | 0                                 | 276 (23.0)  | 1.00              | 1.00              | 1.00              |
|                             | 1                                 | 781 (65.0)  | 1.55 (0.77-3.13)  | 1.53 (0.97-2.40)  | 1.06 (0.60-1.88)  |
|                             | 2                                 | 112 (9.3)   | 1.51 (0.53-4.25)  | 0.45 (0.17-1.20)  | 1.33 (0.57-3.08)  |
|                             | 3+                                | 33 (2.8)    | 1.72 (0.36-8.19)  | NA                | 1.52 (0.42-5.50)  |
|                             | Vigorous physical activity        |             |                   |                   |                   |
|                             | Never or occasionally             | 1023 (85.1) | 1.00              | 1.00              | 1.00              |
|                             | Once or twice per week            | 130 (10.8)  | 0.61 (0.22-1.70)  | 0.48 (0.23-1.01)  | 0.51 (0.20-1.29)  |
|                             | Three or more times a week        | 49 (4.1)    | 2.66 (1.08-6.54)  | 1.22 (0.54-2.77)  | 0.27 (0.04-1.96)  |
|                             | Watch television                  |             |                   |                   |                   |
|                             | Less than 1 hour                  | 199 (16.6)  | 1.00              | 1.00              | 1.00              |
|                             | 1 hour but less than 3 hours      | 672 (55.9)  | 1.64 (0.72-3.74)  | 0.86 (0.53-1.41)  | 0.96 (0.53-1.76)  |
|                             | 3 hours but less than 5 hours     | 189 (15.7)  | 0.90 (0.30-2.73)  | 0.91 (0.49-1.70)  | 0.40 (0.15-1.06)  |
|                             | 5 hours or more                   | 142 (11.8)  | 2.08 (0.77-5.60)  | 1.34 (0.72-2.49)  | 0.93 (0.40-2.13)  |
|                             | Fuel for cooking                  |             |                   |                   |                   |
|                             | Electricity                       | 84 (7.0)    | 1.00              | 1.00              | 1.00              |

|                                                     |              |                  |                   |                   |
|-----------------------------------------------------|--------------|------------------|-------------------|-------------------|
| Gas                                                 | 1078 (89.7)  | 0.90 (0.21-3.84) | 1.67 (0.71-3.92)  | 1.43 (0.51-4.02)  |
| Open fires                                          | 7 (0.6)      | NA               | 2.17 (0.22-21.06) | NA                |
| Others                                              | 33 (2.8)     | NA               | 4.16 (1.32-13.14) | 2.76 (0.65-11.76) |
| Paracetamol use in the first 12 months of life      |              |                  |                   |                   |
| Yes                                                 | 1049 (87.3)  | 2.93 (0.91-9.46) | 1.22 (0.69-2.15)  | 1.02 (0.52-2.03)  |
| No                                                  | 153 (12.7)   | 1.00             | 1.00              | 1.00              |
| Paracetamol use in the past 12 months               |              |                  |                   |                   |
| Never                                               | 267 (22.2)   | 1.00             | 1.00              | 1.00              |
| at least once a year                                | 767 (63.8)   | 3.42 (1.35-8.69) | 1.80 (1.08-3.01)  | 0.98 (0.55-1.74)  |
| at least once per month                             | 168 (14.0)   | 2.97 (0.98-9.01) | 2.39 (1.28-4.47)  | 1.44 (0.70-2.97)  |
| Antibiotics in the first 12 months                  |              |                  |                   |                   |
| Yes                                                 | 876 (72.9)   | 2.56 (1.20-5.44) | 1.46 (0.95-2.24)  | 1.05 (0.63-1.76)  |
| No                                                  | 326 (27.1)   | 1.00             | 1.00              | 1.00              |
| Trucks pass through the street                      |              |                  |                   |                   |
| Never                                               | 512 (42.6)   | 1.00             | 1.00              | 1.00              |
| Seldom                                              | 324 (27.0)   | 1.06 (0.57-1.95) | 0.90 (0.59-1.39)  | 0.96 (0.56-1.67)  |
| Frequently through the day                          | 279 (23.2)   | 0.74 (0.36-1.51) | 0.78 (0.49-1.25)  | 0.75 (0.40-1.40)  |
| Almost the whole day                                | 87 (7.2)     | 1.10 (0.41-2.93) | 0.81 (0.39-1.69)  | 1.16 (0.50-2.69)  |
| Breast feeding                                      |              |                  |                   |                   |
| Yes                                                 | 1.152 (95.8) | 0.83 (0.25-2.75) | 2.08 (0.64-6.77)  | 0.81 (0.28-2.32)  |
| No                                                  | 50 (4.2)     | 1.00             | 1.00              | 1.00              |
| Cat or dog in home in the first year of life        |              |                  |                   |                   |
| Yes                                                 | 333 (27.7)   | 1.01 (0.57-1.79) | 1.12 (0.76-1.65)  | 0.69 (0.40-1.19)  |
| No                                                  | 869 (72.3)   | 1.00             | 1.00              | 1.00              |
| Cat or dog in home in the past 12 months            |              |                  |                   |                   |
| Yes                                                 | 335 (27.9)   | 1.00 (0.56-1.78) | 1.11 (0.75-1.63)  | 1.12 (0.68-1.83)  |
| No                                                  | 967 (72.1)   | 1.00             | 1.00              | 1.00              |
| Contact with farm animals in the first year of life |              |                  |                   |                   |
| Yes                                                 | 77 (6.4)     | 1.03 (0.36-2.91) | 0.64 (0.27-1.49)  | 0.55 (0.17-1.79)  |
| No                                                  | 1125 (93.6)  | 1.00             | 1.00              | 1.00              |
| Mother regular contact with farm animals            |              |                  |                   |                   |
| Yes                                                 | 110 (9.2)    | 0.32 (0.08-1.35) | 1.14 (0.63-2.06)  | 1.46 (0.73-2.92)  |
| No                                                  | 1092 (90.9)  | 1.00             | 1.00              | 1.00              |
| Living in urban communes                            |              |                  |                   |                   |
| Yes                                                 | 768 (63.9)   | 1.37 (0.78-2.41) | 1.03 (0.71-1.49)  | 1.53 (0.92-2.54)  |
| No                                                  | 434 (36.1)   | 1.00             | 1.00              | 1.00              |
| Mother smoke                                        |              |                  |                   |                   |

|                                                |             |                   |                   |                   |
|------------------------------------------------|-------------|-------------------|-------------------|-------------------|
| Yes                                            | 6 (0.5)     | 3.79 (0.44-32.92) | 1.55 (0.18-13.33) | 2.83 (0.33-24.50) |
| No                                             | 1196 (99.5) | 1.00              | 1.00              | 1.00              |
| Mother smoke during child's first year of life |             |                   |                   |                   |
| Yes                                            | 7 (0.6)     | 3.50 (0.37-26.61) | 1.29 (0.15-10.77) | NA                |
| No                                             | 1195 (99.4) | 1.00              | 1.00              | 1.00              |
| Father smoke                                   |             |                   |                   |                   |
| Yes                                            | 629 (52.3)  | 0.71 (0.42-1.19)  | 0.93 (0.65-1.33)  | 1.32 (0.83-2.09)  |
| No                                             | 573 (47.7)  | 1.00              | 1.00              | 1.00              |
| Father smoke during mother's pregnancy         |             |                   |                   |                   |
| Yes                                            | 684 (56.9)  | 0.67 (0.35-1.29)  | 0.64 (0.45-0.91)  | 1.52 (0.94-2.46)  |
| No                                             | 518 (43.1)  | 1.00              | 1.00              | 1.00              |
| Smoker(s) in household                         |             |                   |                   |                   |
| Yes                                            | 685 (57.0)  | 0.88 (0.53-1.48)  | 1.05 (0.73-1.50)  | 1.52 (0.94-2.46)  |
| No                                             | 517 (43.0)  | 1.00              | 1.00              | 1.00              |

OR, odds ratio; 95% CI, 95% confidence interval
